# Supplementary material for: Modulation in the microRNA repertoire is responsible for the stage-specific effects of Akt suppression on murine neuroendocrine prostate cancer
Source: PubMed Central journal article supplement — Heliyon. 2018 Sep 17;4(9):e00796. doi: 10.1016/j.heliyon.2018.e00796 (PMC6143703; doi:10.1016/j.heliyon.2018.e00796), 2018-09-17
Supplement: mmc1.pdf [file mmc1.pdf]

**SUPPLEMENTAL TABLE 1.** Genes and cellular pathways regulated by the upregulated microRNAs in *TRAMP/Akt1*<sup>-/-</sup> compared to *TRAMP/Akt1*<sup>+/+</sup> prostate

| Genes         | Gene associated pathways and cellular processes                                                                                                                                                                                                                                                                                                                                                            |
|---------------|------------------------------------------------------------------------------------------------------------------------------------------------------------------------------------------------------------------------------------------------------------------------------------------------------------------------------------------------------------------------------------------------------------|
| Irf2bp2       | Transcription                                                                                                                                                                                                                                                                                                                                                                                              |
| Gpd1l         | Glycerophospholipid biosynthesis; Metabolism of fatty acid, triacylglycerol and ketone bodies; Metabolism of lipids and lipoproteins                                                                                                                                                                                                                                                                       |
| Wwc1          | Hippo signaling; Endoderm differentiation                                                                                                                                                                                                                                                                                                                                                                  |
| Jarid2        | Pluripotency of stem cells; Epigenetic regulation of gene expression                                                                                                                                                                                                                                                                                                                                       |
| Tshz3         | Transcription                                                                                                                                                                                                                                                                                                                                                                                              |
| Tgfb2         | FoxO signaling pathway; MAPK signaling pathway; Cytokine-cytokine receptor interaction; MicroRNAs in cancer; Pathways in cancer; Extracellular matrix organization; Endocytosis                                                                                                                                                                                                                            |
| Atxn7         | Chromatin modifying enzymes; Post-translational protein modification; Deubiquitination; Metabolism of proteins                                                                                                                                                                                                                                                                                             |
| Caprin1       | Regulation of translation; Dendrite morphogenesis                                                                                                                                                                                                                                                                                                                                                          |
| March7        | T-cell proliferation; Protein ubiquitination                                                                                                                                                                                                                                                                                                                                                               |
| Naa40 (Patt1) | N-terminal protein amino acid acetylation; Lipid metabolism                                                                                                                                                                                                                                                                                                                                                |
| Apbb1         | DNA double strand break response; DNA repair                                                                                                                                                                                                                                                                                                                                                               |
| Cacna1b       | MAPK signaling pathways; Calcium signaling pathway                                                                                                                                                                                                                                                                                                                                                         |
| Fgf4          | MAPK signaling pathway; RAF/MAP kinase cascade; Rap1 signaling pathway; Focal adhesion-PI3K-Akt-mTOR-signaling pathway; Signaling by VEGF; Signaling to ERKs; Signaling to RAS; Interleukin-2 signaling; Interleukin-3, 5 and GM-CSF signaling; Insulin receptor signaling cascade; Embryonic stem cells (ESC) pluripotency pathways; Regulation of actin cytoskeleton; VEGFR2 mediated cell proliferation |
| Ncapg2        | Mesodermal commitment pathway ; Cell cycle; Condensation of prophase chromosomes; Endoderm differentiation                                                                                                                                                                                                                                                                                                 |
| Fastkd2       | Protein phosphorylation; Cellular respiration; Mitochondrial large ribosomal subunit assembly                                                                                                                                                                                                                                                                                                              |
| Adrbk2 (Grk3) | Chemokine signaling pathway; Hedgehog signaling pathway; Thromboxane A2 receptor signaling; Signaling by GPCR; Clathrin-mediated endocytosis; Membrane trafficking                                                                                                                                                                                                                                         |
| Npas2         | Metabolism of fatty acid, triacylglycerol and ketone bodies; Metabolism of lipids and lipoproteins; Regulation of lipid metabolism by peroxisome proliferator-activated receptor alpha (PPAR $\alpha$ )                                                                                                                                                                                                    |
| Asap3         | Endocytosis; Fc gamma R-mediated phagocytosis                                                                                                                                                                                                                                                                                                                                                              |
| Cdkn2aip      | Regulation of signal transduction; Protein stability and cell growth                                                                                                                                                                                                                                                                                                                                       |
| Fzd6          | MTOR signaling pathway; $\beta$ -catenin independent Wnt signaling; Wnt signaling in cancer; Proteoglycans in cancer; ESC pluripotency pathways                                                                                                                                                                                                                                                            |
| Nlk           | FoxO signaling pathway; IL-6 signaling pathway; MAPK signaling pathway; Presenilin action in Notch and Wnt signaling; $\beta$ -catenin independent Wnt signaling; Noncanonical Wnt signaling pathway; Adherens junction; Ectoderm differentiation                                                                                                                                                          |
| Pfkfb4        | AMPK signaling pathway; Glycolysis and metabolism of carbohydrates                                                                                                                                                                                                                                                                                                                                         |
| Ero1lb        | Protein processing in endoplasmic reticulum                                                                                                                                                                                                                                                                                                                                                                |
| Gcnt2         | Glycosphingolipid biosynthesis; Terminal O-glycans residues modification; Metabolic pathways                                                                                                                                                                                                                                                                                                               |
| Cx3cr1        | Chemokine signaling pathway; Signaling by GPCR; Cytokine-cytokine receptor interaction                                                                                                                                                                                                                                                                                                                     |

**SUPPLEMENTAL TABLE 1.** Continued

| Genes           | Gene associated pathways and cellular processes                                                                                                                                                                                                                                                                                                           |
|-----------------|-----------------------------------------------------------------------------------------------------------------------------------------------------------------------------------------------------------------------------------------------------------------------------------------------------------------------------------------------------------|
| Cyb5r2          | Amino sugar and nucleotide sugar metabolism; Metabolism and oxidation by cytochrome P450                                                                                                                                                                                                                                                                  |
| Fzd4            | β-catenin independent Wnt signaling; Hippo signaling ; Wnt signaling pathway; MTOR signaling; Signaling by GPCR; Clathrin-mediated endocytosis; Ectoderm differentiation; Membrane trafficking; Mesodermal commitment pathway; Proteoglycans in cancer; Pluripotency                                                                                      |
| Podxl           | Ectoderm differentiation                                                                                                                                                                                                                                                                                                                                  |
| Pou3f2          | Mecp2 and associated Rett syndrome                                                                                                                                                                                                                                                                                                                        |
| Sulf1           | Wnt signaling pathway; BMP signaling pathway; Endothelial growth factor receptor signaling pathway; Fibroblast growth factor receptor signaling pathway; Cell apoptosis; Angiogenesis; Endothelial cell proliferation; Cell migration; Prostatic bud formation; Bone development                                                                          |
| Acot8           | Synthesis of bile acids and bile salts; Metabolism of fatty acid, triacylglycerol, and ketone bodies; Metabolism of lipids and lipoproteins; Alpha-linolenic acid (ALA) metabolism; Peroxisomal lipid metabolism                                                                                                                                          |
| Bcl2l13         | Apoptosis                                                                                                                                                                                                                                                                                                                                                 |
| Gon4l           | Transcription                                                                                                                                                                                                                                                                                                                                             |
| Fut9            | Glycosphingolipid biosynthesis; Mannose type O-glycan biosynthesis; Metabolic pathways                                                                                                                                                                                                                                                                    |
| Ppil3<br>(CypJ) | Regulation of mRNA splicing and protein folding                                                                                                                                                                                                                                                                                                           |
| Ptpu            | Canonical Wnt signaling pathway; Erythropoietin receptor signaling; Transmembrane receptor protein tyrosine phosphatase signaling pathway; Signaling by stem cell factor-KIT; Cell adhesion; Cell proliferation; Cell migration; Protein dephosphorylation                                                                                                |
| Sun1            | Cell cycle; Cytoskeletal anchoring at nuclear membrane and nucleokinesis involved in cell motility in cerebral cortex radial glia guided migration                                                                                                                                                                                                        |
| Pkn2            | PI3K-Akt signaling pathway; Signaling by Rho GTPases                                                                                                                                                                                                                                                                                                      |
| Itk             | Chemokine signaling pathway, T-cell receptor signaling pathway; Leukocyte transendothelial migration; Protein phosphorylation; Cell proliferation                                                                                                                                                                                                         |
| Map3k<br>11     | FCERI mediated MAPK activation; Gastrin-CREB signaling pathway via PKC and MAPK; Interleukin-2, 3, 5 and GM-CSF signaling; Oncogenic MAPK signaling; RAC1 signaling; Signaling by PDGF; Signaling by RAS; Angiopoietin like protein 8 regulatory pathway; VEGFR2 mediated cell proliferation; Protein phosphorylation; Cell proliferation; Cell apoptosis |
| Tacr1           | Gastrin-CREB signaling pathway via PKC and MAPK; Signaling by GPCR; Clathrin-mediated endocytosis; Membrane trafficking; Epithelial cell proliferation and migration; Vascular permeability                                                                                                                                                               |
| Thoc1           | Gene expression; Cleavage of growing transcript in the termination region; mRNA 3'-end processing                                                                                                                                                                                                                                                         |
| Fubp1           | Transcription; Gene expression                                                                                                                                                                                                                                                                                                                            |
| Apc             | Wnt signaling pathways; Hippo signaling pathway; β-catenin phosphorylation cascade; Pathways and microRNAs in cancer; Apoptosis; Deubiquitination; ESC pluripotency pathways; Metabolism of proteins; Post-translational protein modification; Regulation of actin cytoskeleton                                                                           |
| Nfia            | Transcription                                                                                                                                                                                                                                                                                                                                             |
| Ccdc80          | Regulation of extracellular matrix organization and cell-substrate adhesion                                                                                                                                                                                                                                                                               |
| Tet1            | Endoderm differentiation; Epigenetic regulation of gene expression; Mesodermal commitment pathway                                                                                                                                                                                                                                                         |
| Col3a1          | TGFβ signaling pathway; Collagen biosynthesis and modifying enzymes; Endothelins; Extracellular matrix organization; Focal adhesion; Senescence and autophagy in cancer; miRNA targets in ECM and membrane receptors                                                                                                                                      |

**SUPPLEMENTAL TABLE 1.** Continued

| Genes          | Gene associated pathways and cellular processes                                                                                                                                                                                                                                                                                                                                                                                                                                                                                                                                                                                                                                                                                                                                                                                                                                                                  |
|----------------|------------------------------------------------------------------------------------------------------------------------------------------------------------------------------------------------------------------------------------------------------------------------------------------------------------------------------------------------------------------------------------------------------------------------------------------------------------------------------------------------------------------------------------------------------------------------------------------------------------------------------------------------------------------------------------------------------------------------------------------------------------------------------------------------------------------------------------------------------------------------------------------------------------------|
| Robo1          | Netrin-1 signaling; Activation of Rac; Regulation of epithelial cell migration and cell-cell adhesion                                                                                                                                                                                                                                                                                                                                                                                                                                                                                                                                                                                                                                                                                                                                                                                                            |
| Pmp22          | $\alpha 6\beta 1$ and $\alpha 6\beta 4$ Integrin signaling; Neural crest differentiation; Regulation of cell proliferation and cell death                                                                                                                                                                                                                                                                                                                                                                                                                                                                                                                                                                                                                                                                                                                                                                        |
| Dpysl5         | Regulation of signal transduction                                                                                                                                                                                                                                                                                                                                                                                                                                                                                                                                                                                                                                                                                                                                                                                                                                                                                |
| Col6a3         | PI3K-Akt signaling pathway; Signaling by PDGF; miRNA targets in ECM and membrane receptors; Assembly of collagen fibrils and other multimeric structures; Collagen biosynthesis and modifying enzymes; ECM-receptor interaction; Focal adhesion                                                                                                                                                                                                                                                                                                                                                                                                                                                                                                                                                                                                                                                                  |
| Lrp6           | Canonical Wnt signaling pathway in cancer; Presenilin action in Notch and Wnt signaling; MTOR signaling pathway; Wnt/ $\beta$ -catenin signaling pathway in leukemia; Regulation of FZD by ubiquitination                                                                                                                                                                                                                                                                                                                                                                                                                                                                                                                                                                                                                                                                                                        |
| Rnd3           | Rho protein signal transduction; Actin cytoskeleton organization; Cell adhesion and migration                                                                                                                                                                                                                                                                                                                                                                                                                                                                                                                                                                                                                                                                                                                                                                                                                    |
| Dusp2          | FCERI mediated MAPK activation; Gastrin-CREB signaling pathway via PKC and MAPK; Interleukin-2, 3, 5 and GM-CSF signaling; RAF/MAP kinase cascade; Signaling by EGFR; PDGF signaling; RAS signaling; Cytokine signaling in immune system; VEGFR2 mediated cell proliferation; Protein dephosphorylation; Endoderm differentiation                                                                                                                                                                                                                                                                                                                                                                                                                                                                                                                                                                                |
| Cd276 (B7-H3)  | Cell adhesion molecules; Regulation of cell proliferation; Immune response; Cytokine production                                                                                                                                                                                                                                                                                                                                                                                                                                                                                                                                                                                                                                                                                                                                                                                                                  |
| Irs1           | AGE/RAGE pathway; AMPK signaling pathway; Adipocytokine signaling pathway; $\alpha 6 \beta 4$ signaling pathway; DAP12 signaling; EPO receptor signaling; Factors and pathways affecting insulin-like growth factor (IGF1)-Akt signaling; Fc epsilon receptor (FCERI) signaling; FoxO signaling pathway; Gastrin-CREB signaling pathway via PKC and MAPK; Growth hormone receptor signaling; IGF1 pathway; IL-4 signaling pathway; Insulin signaling pathway; Integrins in angiogenesis; Interleukin-2, 3, 5 and GM-CSF signaling; Leptin signaling pathway; MAPK family signaling cascades; Oncostatin M signaling pathway; PI3K-Akt signaling in cancer; Prolactin signaling pathway; RAF/MAP kinase cascade; Signaling pathways in glioblastoma; Signaling by EGFR; Signaling by GPCR; Signaling by PDGF; Signaling by VEGF; Signaling to ERKs; Signaling to RAS; MTOR signaling pathway; MicroRNAs in cancer |
| Tet3           | Epigenetic regulation of gene expression; DNA demethylation; Protein O-linked glycosylation; Oxidation-reduction process; MECP2 and Associated Rett Syndrome                                                                                                                                                                                                                                                                                                                                                                                                                                                                                                                                                                                                                                                                                                                                                     |
| Rnf13          | Integral component of membrane                                                                                                                                                                                                                                                                                                                                                                                                                                                                                                                                                                                                                                                                                                                                                                                                                                                                                   |
| Vegfa          | PI3K-Akt signaling pathway; HIF-1 signaling pathway; Rap1 signaling; Oncostatin M signaling pathway; Signaling by VEGF; Interleukin-4 and 13 signaling; Integrins in angiogenesis; miR-148a/miR-31/FIH1/HIF1 $\alpha$ ; Notch signaling in glioblastoma; Pathways in cancer; MicroRNAs in cancer; Proteoglycans in cancer; Focal adhesion; Epithelial cell differentiation; Angiogenesis; Endothelial cell chemotaxis; Cytokine-cytokine receptor interaction; Differentiation pathway                                                                                                                                                                                                                                                                                                                                                                                                                           |
| Lims1 (PINCH)  | NIK/NF-kappa B signaling; TNF-mediated signaling pathway; Cell junction organization; Cell-cell communication; Focal adhesion assembly; Cell-extracellular matrix interactions; Cell-substrate adhesion; Regulation of cytoskeletal remodeling and cell spreading by IPP complex components; GTPase activity                                                                                                                                                                                                                                                                                                                                                                                                                                                                                                                                                                                                     |
| Mlf1           | Transcriptional misregulation in cancer; Transcription; Cell cycle arrest                                                                                                                                                                                                                                                                                                                                                                                                                                                                                                                                                                                                                                                                                                                                                                                                                                        |
| Ntsr2          | Signaling by GPCR; Gastrin-CREB signaling pathway via PKC and MAPK                                                                                                                                                                                                                                                                                                                                                                                                                                                                                                                                                                                                                                                                                                                                                                                                                                               |
| Ireb2 (Irp2)   | Validated targets of C-MYC transcriptional activation; Metabolic process; Iron ion transport                                                                                                                                                                                                                                                                                                                                                                                                                                                                                                                                                                                                                                                                                                                                                                                                                     |
| Ybx3           | Apoptosis; Tight junction; Spermatogenesis; Organ growth; Regulation of necroptotic process                                                                                                                                                                                                                                                                                                                                                                                                                                                                                                                                                                                                                                                                                                                                                                                                                      |
| Zfp692         | Transcription                                                                                                                                                                                                                                                                                                                                                                                                                                                                                                                                                                                                                                                                                                                                                                                                                                                                                                    |
| Sh3glb1 (Bif1) | Senescence and autophagy in cancer; Endocytosis; Regulation of cytokinesis; Regulation of protein stability                                                                                                                                                                                                                                                                                                                                                                                                                                                                                                                                                                                                                                                                                                                                                                                                      |
| Sparc          | Senescence and autophagy in cancer; Extracellular matrix organization; Cellular response to growth factor stimulus; CM proteoglycans; Vesicle-mediated transport; Bone development; Response to cytokine                                                                                                                                                                                                                                                                                                                                                                                                                                                                                                                                                                                                                                                                                                         |

**SUPPLEMENTAL TABLE 1.** Continued

| Genes         | Gene associated pathways and cellular processes                                                                                                                                                                                                                                                                                                          |
|---------------|----------------------------------------------------------------------------------------------------------------------------------------------------------------------------------------------------------------------------------------------------------------------------------------------------------------------------------------------------------|
| Grip1 (SRC-2) | Intracellular signal transduction; Androgen receptor signaling pathway; Brain-Derived Neurotrophic Factor (BDNF) signaling pathway; Glutamate binding; Trafficking of AMPA receptors; Transcription                                                                                                                                                      |
| Fem1b         | Apoptosis; Branching involved in prostate gland morphogenesis; Epithelial cell maturation involved in prostate gland development; Post-translational protein modification                                                                                                                                                                                |
| Nap1l3        | Nucleosome assembly                                                                                                                                                                                                                                                                                                                                      |
| Loxl2         | Canonical and Non-Canonical TGF $\beta$ signaling; Assembly of collagen fibrils and other multimeric structures; Collagen formation; Extracellular matrix organization; Cell adhesion; Endothelial cell migration; Endothelial cell proliferation; Epithelial to mesenchymal transition; Angiogenesis                                                    |
| Rnf19a        | Microtubule cytoskeleton organization; Protein polyubiquitination                                                                                                                                                                                                                                                                                        |
| Trib2         | MAP kinase activity; Cell differentiation; Protein kinase activity; Proteasomal ubiquitin-dependent protein catabolic process                                                                                                                                                                                                                            |
| Eps15         | EGF/EGFR signaling pathway; Notch signaling pathway; Signaling events mediated by Hepatocyte Growth Factor Receptor (c-Met); Clathrin-mediated endocytosis; Membrane trafficking; Cell proliferation                                                                                                                                                     |
| Has3          | Glycosaminoglycan metabolism; Hyaluronan metabolism; Metabolism of carbohydrates; Cell adhesion; Extracellular matrix assembly                                                                                                                                                                                                                           |
| Col4a1        | PI3K-Akt signaling pathway; Signaling by PDGF; Epithelial cell differentiation; Protein digestion and absorption; Collagen formation; Assembly of collagen fibrils and other multimeric structures; Extracellular matrix organization; ECM-receptor interaction; Focal adhesion; Vesicle-mediated transport; miRNA targets in ECM and membrane receptors |
| Col11a1       | Collagen formation; Assembly of collagen fibrils and other multimeric structures; Extracellular matrix organization; ECM-receptor interaction; Focal adhesion; Endodermal cell differentiation; Proteoglycan metabolic process                                                                                                                           |
| Gpr37         | Adenylate cyclase-inhibiting G-protein coupled receptor signaling pathway; Signaling by GPCR; MAPK cascade; Dopamine metabolic process                                                                                                                                                                                                                   |
| Narf          | Oxidation-reduction process                                                                                                                                                                                                                                                                                                                              |
| Nasp          | DNA replication; Cell proliferation; Protein transport; Male gonad development; Response to testosterone                                                                                                                                                                                                                                                 |
| Zdhc5         | Protein palmitoylation                                                                                                                                                                                                                                                                                                                                   |
| Trabd2b       | Wnt signaling pathway; Protein oligomerization; Protein oxidation; Proteolysis                                                                                                                                                                                                                                                                           |
| Ifi30         | Cytokine signaling in immune system; Interferon signaling; Oxidation-reduction process                                                                                                                                                                                                                                                                   |
| Stap2         | Signaling by PTK6; Tyrosine phosphorylation of STAT protein                                                                                                                                                                                                                                                                                              |
| Col5a1        | Collagen formation; Assembly of collagen fibrils and other multimeric structures; Extracellular matrix organization; Focal adhesion; Protein digestion and absorption; miRNA targets in ECM and membrane receptors; Cell adhesion; Cell migration; Blood vessel development; Integrin biosynthetic process                                               |
| Rcn2          | Protein binding                                                                                                                                                                                                                                                                                                                                          |
| Lin7a         | Exocytosis; Epithelial cell apical/basal polarity; Protein transport; Protein-containing complex assembly                                                                                                                                                                                                                                                |
| Mcm8          | Activation of ATR (ATM- and rad3-related kinase) in response to replication stress; Cell cycle; DNA replication                                                                                                                                                                                                                                          |
| Rex2          | Ribosome biogenesis in eukaryotes                                                                                                                                                                                                                                                                                                                        |
| Sstr1         | Somatostatin signaling pathway; Neuropeptide signaling pathway; Signaling by GPCR; cAMP signaling pathway; Regulation of cell proliferation                                                                                                                                                                                                              |
| Nid1          | Degradation of the extracellular matrix; Extracellular matrix organization; Laminin interactions; Cell-matrix adhesion                                                                                                                                                                                                                                   |

**SUPPLEMENTAL TABLE 1.** Continued

| Genes                 | Gene associated pathways and cellular processes                                                                                                                                                                                                                                                                                                                                                                                                                                                                                                                                                                                                                                                                                                                                                                                                                 |
|-----------------------|-----------------------------------------------------------------------------------------------------------------------------------------------------------------------------------------------------------------------------------------------------------------------------------------------------------------------------------------------------------------------------------------------------------------------------------------------------------------------------------------------------------------------------------------------------------------------------------------------------------------------------------------------------------------------------------------------------------------------------------------------------------------------------------------------------------------------------------------------------------------|
| Rgs17                 | Signaling by GPCR; Regulation of GTPase activity                                                                                                                                                                                                                                                                                                                                                                                                                                                                                                                                                                                                                                                                                                                                                                                                                |
| Klf14                 | Transcription by RNA polymerase II                                                                                                                                                                                                                                                                                                                                                                                                                                                                                                                                                                                                                                                                                                                                                                                                                              |
| Nek8                  | Hippo signaling; Protein phosphorylation                                                                                                                                                                                                                                                                                                                                                                                                                                                                                                                                                                                                                                                                                                                                                                                                                        |
| Ttbk2                 | Anchoring of the basal body to the plasma membrane; Cell migration and shape; Organelle biogenesis and maintenance                                                                                                                                                                                                                                                                                                                                                                                                                                                                                                                                                                                                                                                                                                                                              |
| Dlx1                  | Notch signaling pathway; BMP signaling pathway; TGF $\beta$ signaling; Cell differentiation; Transcription by RNA polymerase II                                                                                                                                                                                                                                                                                                                                                                                                                                                                                                                                                                                                                                                                                                                                 |
| Urgcp                 | Cell cycle                                                                                                                                                                                                                                                                                                                                                                                                                                                                                                                                                                                                                                                                                                                                                                                                                                                      |
| Cdc42bpb              | Actin cytoskeleton reorganization; Cell migration; Cell polarity; Intracellular signal transduction; Protein phosphorylation                                                                                                                                                                                                                                                                                                                                                                                                                                                                                                                                                                                                                                                                                                                                    |
| Kras                  | PI3K-AKT-mTOR signaling pathway; Rac1/Pak1/p38/MMP-2 pathway; Oncogenic MAPK signaling pathway; TNF $\alpha$ signaling pathway; Interleukin-2, 3, 5 and GM-CSF signaling; Tie2 signaling; VEGF signaling pathway; FoxO signaling pathway; BDNF-TrkB signaling; Apelin signaling pathway; Chemokine signaling pathway; ErbB signaling pathway; Gastrin-CREB signaling pathway via PKC and MAPK; Signaling by EGFR in cancer; Signaling by FGFR; Signaling by GPCR; Signaling to ERKs; Signaling to RAS; RAF activation; Oxytocin signaling pathway; Prolactin signaling pathway; GnRH signaling pathway; Estrogen signaling pathway; FRS-mediated FGFR1 signaling; Fc epsilon receptor (FCERI) signaling; Gap junction; Choline metabolism in cancer; Apoptosis; B cell receptor signaling pathway; Acute myeloid leukemia; Central carbon metabolism in cancer; |
| Hnrnpd                | mRNA processing; mRNA splicing; Transcription                                                                                                                                                                                                                                                                                                                                                                                                                                                                                                                                                                                                                                                                                                                                                                                                                   |
| Parp1                 | NF-kappa B signaling pathway; Signaling by TGF $\beta$ receptor complex; Apoptosis; Base excision repair; Downregulation of SMAD2/3:SMAD4 transcriptional activity; Fas Ligand (FasL) pathway and Stress induction of Heat Shock Proteins (HSP) regulation; Generic transcription pathway; Metabolism of proteins                                                                                                                                                                                                                                                                                                                                                                                                                                                                                                                                               |
| Appl1                 | Follicle Stimulating Hormone (FSH) signaling pathway; Caspase activation via extrinsic apoptotic signaling pathway; Coregulation of androgen receptor activity; Pathways in cancer; Apoptosis                                                                                                                                                                                                                                                                                                                                                                                                                                                                                                                                                                                                                                                                   |
| Btbd3                 | Regulation of proteolysis; Response to stress; Dendrite morphogenesis                                                                                                                                                                                                                                                                                                                                                                                                                                                                                                                                                                                                                                                                                                                                                                                           |
| Galnt7                | Metabolism of proteins; O-glycan biosynthesis; Post-translational protein modification; Carbohydrate metabolic process                                                                                                                                                                                                                                                                                                                                                                                                                                                                                                                                                                                                                                                                                                                                          |
| Magea2                | Signal transduction by p53 class mediator; Transcription; Regulation of protein catabolic process (acetylation and sumoylation); Cellular senescence                                                                                                                                                                                                                                                                                                                                                                                                                                                                                                                                                                                                                                                                                                            |
| Ppp2r1b               | AMPK signaling pathway; Activated TLR4 signaling; $\beta$ catenin phosphorylation cascade; DAP12 signaling; Fc epsilon receptor (FCERI) signaling; Hippo signaling pathway; FCERI mediated MAPK activation; Gastrin-CREB signaling pathway via PKC and MAPK; IRS-mediated signaling; Interleukin receptor SHC signaling; Interleukin-2, 3, 5 and GM-CSF signaling; MAPK family signaling cascades; PI3K-Akt signaling pathway; RAF activation; RET signaling; Signaling by EGFR; Signaling by GPCR; Signaling by Interleukins; Signaling by Rho GTPases; Signaling by VEGF; Signaling by wnt in cancer; Signaling to ERKs; Signaling to RAS; TGF $\beta$ signaling pathway; Regulation of TP53 Activity; Cell cycle; Glucose metabolism; Glycogen metabolism; Tight junction; Toll-like receptors cascades; VEGFR2 mediated cell proliferation;                 |
| Ctnna2                | Hippo signaling pathway; Pathways in cancer; Adherens junction; Cell differentiation; Bacterial invasion of epithelial cells; Leukocyte transendothelial migration;                                                                                                                                                                                                                                                                                                                                                                                                                                                                                                                                                                                                                                                                                             |
| Tfpi2                 | Regulation of endopeptidase activity and extracellular matrix structural                                                                                                                                                                                                                                                                                                                                                                                                                                                                                                                                                                                                                                                                                                                                                                                        |
| 2610018G03Rik (Stk26) | MAPK cascade; LKB1 signaling; Protein phosphorylation; Cell migration; Apoptosis; Apoptotic cleavage of cellular proteins                                                                                                                                                                                                                                                                                                                                                                                                                                                                                                                                                                                                                                                                                                                                       |
| Cldn23                | Cell adhesion molecules (CAMs); Cell-Cell communication; Leukocyte transendothelial migration; Tight junction                                                                                                                                                                                                                                                                                                                                                                                                                                                                                                                                                                                                                                                                                                                                                   |
| Kctd12                | Component of cell junction; Regulates RNA and protein binding                                                                                                                                                                                                                                                                                                                                                                                                                                                                                                                                                                                                                                                                                                                                                                                                   |

**SUPPLEMENTAL TABLE 2.** Genes and cellular pathways regulated by the downregulated microRNAs in *TRAMP/Akt1*<sup>-/-</sup> compared to *TRAMP/Akt1*<sup>+/+</sup> prostate

| Genes                | Gene associated pathways and cellular processes                                                                                                                                                                                                                                |
|----------------------|--------------------------------------------------------------------------------------------------------------------------------------------------------------------------------------------------------------------------------------------------------------------------------|
| Mcl1                 | PI3K signaling and apoptosis                                                                                                                                                                                                                                                   |
| Dlec1                | Pathways in lung cancer and prostate cancer                                                                                                                                                                                                                                    |
| Arhgef11<br>(RhoGEF) | Pathways in cancer                                                                                                                                                                                                                                                             |
| Snd1                 | MAPK signaling and viral carcinogenesis                                                                                                                                                                                                                                        |
| Cse1l                | P53 pathway; Ras-induced cancer; Apoptosis                                                                                                                                                                                                                                     |
| Ank2                 | Metabolism of proteins; Post-translational protein modification; Membrane trafficking in cancer                                                                                                                                                                                |
| Ptgs2                | VEGF signaling, TNF signaling; NFKB signaling; Interleukin-4/10/13/17 signaling pathways; Cytokine signaling in immune system; Lipid and lipoproteins metabolism                                                                                                               |
| Rad1                 | Cellular senescence; Regulation of cell cycle and cell division; DNA repair                                                                                                                                                                                                    |
| Wnt9b and<br>Wnt5b   | MTOR and Wnt signaling pathways; Signaling regulating proteoglycan in cancer and basal cell carcinoma,; Signaling regulating pluripotency of stem cells                                                                                                                        |
| Kras                 | PI3K-AKT-mTOR signaling; Ras signaling; MAPK signaling, FoxO signaling; EGFR and FGFR signaling; Rap1 signaling; Signaling regulating autophagy and apoptosis; BDNF-TrkB signaling; Chemokines signaling pathways; Gap junction; Viral carcinogenesis; Proteoglycans in cancer |
| Grhl2                | Regulation of tumor metastasis via RhoG; Cell junction protein expression                                                                                                                                                                                                      |
| Rasal2               | Ras signaling, MAPK1/MAPK3 signaling; IRS-mediated signaling; VEGFA-VEGFR2 signaling; Signaling to p38 MAPK via RIT and RIN                                                                                                                                                    |
| Mgat3                | Metabolic signaling; Metabolism of proteins; Expansion and stabilization of the E-cadherin adherens junction; Post-translational protein modification and N-Glycan biosynthesis                                                                                                |
| Swap70               | Oncogene; Regulation of actin rearrangement                                                                                                                                                                                                                                    |
| Epn2                 | Clathrin-mediated endocytosis; Membrane trafficking and ubiquitin-binding adaptor proteins                                                                                                                                                                                     |
| Hmgn1                | P38 MAPK signaling pathway; MAPK-Erk Pathway; DNA Repair                                                                                                                                                                                                                       |
| Fgf13                | PI3K-Akt signaling; Rap1 signaling; NRF2 pathway; MAPK signaling; Ras signaling; ERK pathway; TGFβ pathway; Regulation of actin cytoskeleton; Proliferation and differentiation of skeletal muscle; Ribosomal biogenesis and neuronal polarization and migration               |
| Gas7                 | Regulation of N-WASP/FAK/F-actin and hnRNP U/β-TrCP/β-catenin pathways in lung cancer; Regulation of neuronal cell morphology via microtubule and actin filament assembly                                                                                                      |
| Mutyh                | Base excision repair; Oxidative damaged gene repair                                                                                                                                                                                                                            |
| Vat1                 | Immune system and neutrophil degranulation                                                                                                                                                                                                                                     |
| Bloc1s2              | Apoptosis                                                                                                                                                                                                                                                                      |
| Bag2                 | Cellular responses to stress; Protein processing in endoplasmic reticulum; Regulation of HSF1-mediated heat shock response                                                                                                                                                     |
| RFwd2                | P53 signaling pathway; P53-Dependent G1/S DNA damage checkpoint; Autodegradation of the E3 ubiquitin ligase COP1                                                                                                                                                               |
| Ccdc8                | Microtubule cytoskeleton organization; Regulation of phosphatase activity; Post-translational protein modification                                                                                                                                                             |
| Nampt                | NOD-like receptor signaling pathway; Adipogenesis; Metabolism of Nicotinate; Metabolism of water-soluble vitamins and cofactors                                                                                                                                                |
| Chek1                | ATM signaling pathway; ATR signaling; DNA repair; Regulation of TP53 activity through phosphorylation; Regulation of p53 signaling pathway and retinoblastoma (RB) in cancer                                                                                                   |
| Cysltr1              | GPCR downstream signaling; Endothelins; Leukotriene receptors; Gastrin-CREB signaling pathway via PKC and MAPK                                                                                                                                                                 |
| Dimt1                | rRNA modification in the nucleus and cytosol; Gene expression                                                                                                                                                                                                                  |

**SUPPLEMENTAL TABLE 3.** Genes involved in the EMT pathways regulated by the upregulated microRNAs in Triciribine-treated advanced *TRAMP* prostates compared to DMSO-treated *TRAMP* prostates

| Genes regulated by miRNAs | EMT genes                                      |
|---------------------------|------------------------------------------------|
| PPARG                     | TGFβ1, N-cadherin, Vimentin, Fibronectin, MMPs |
| CUX1                      | TGFB1 migratory effect                         |
| ID2                       | α-SMA                                          |
| MTDH                      | N-cadherin, Vimentin, Snail, Fibronectin       |
| HS3ST3B1                  | Snail                                          |
| Slc39a6                   | Snail                                          |
| Vsnl1                     | Snail                                          |
| Flt1                      | N-cadherin, Vimentin                           |
| Hspb1                     | Snail, Vimentin                                |
| Mta3                      | Snail                                          |
| Snai1                     | Snail                                          |
| Ror2                      | Snail                                          |
| Pin1                      | Snail                                          |
| Hpse                      | α-SMA, Vimentin, Fibronectin, MMP9             |
| Tcf7                      | MMP7                                           |
| Sema7a                    | TGFβ1-induced EMT                              |
| Rgs3                      | Snail                                          |
| Lep                       | N-cadherin, Vimentin, Snail, Fibronectin, Slug |
| Dlx4                      | Twist, Snail                                   |
| Nfic                      | Vimentin                                       |
| Tnc                       | α-SMA, Fibronectin                             |
| Foxm1                     | Snail, Vimentin, ZEB1, ZEB2                    |
| Srf                       | RhoA                                           |

**SUPPLEMENTAL TABLE 4.** Genes involved in the EMT pathways regulated by the downregulated microRNAs in Triciribine-treated advanced *TRAMP* prostates compared to DMSO-treated *TRAMP* prostates

| <b>Genes regulated by miRNAs</b> | <b>EMT genes</b>                                 |
|----------------------------------|--------------------------------------------------|
| TGFBR1                           | Slug                                             |
| HMGA2                            | N-cadherin, Vimentin, Snail, Slug, Twist         |
| RGS3                             | Snail                                            |
| FSCN1                            | Vimentin, Snail                                  |
| DAB2                             | N-cadherin                                       |
| MTDH                             | N-cadherin, Vimentin, Snail, Fibronectin         |
| MAP3K7/TAK1                      | N-cadherin, Vimentin, Fibronectin                |
| MAPK8                            | HMGA2 and FSP-1                                  |
| EGFR                             | Twist-1, N-cadherin, Vimentin, Fibronectin, MMP9 |
| COL8A1                           | Vimentin, FSP-1 and MMP2                         |
| EZH2                             | Fibronectin, N-cadherin, Vimentin, Slug          |
| GAB2                             | ZEB1                                             |
| HS3ST3B1                         | Snail                                            |
